# Supplementary material for: Facile synthesis of multifunctional pharmaceutical carbon dots for targeted bioimaging and chemotherapy of tumors
Source: Royal Society of Chemistry journal article supplement (doi:10.1039/d2nr03321f), 2022-01-01
Supplement: d2nr03321f1.pdf [file d2nr03321f1.pdf]

## Supporting Information

### Facile synthesis of multifunctional pharmaceutical carbon dots for targeted bioimaging and chemotherapy of tumors

*Jiafeng Wan<sup>a</sup>, Shiqing Xu<sup>d</sup>, Jing Li<sup>c</sup>, Mengliu Yu<sup>c</sup>, Kai Zhang<sup>c\*</sup>, Gang Wei<sup>b\*</sup> and Zhiqiang Su<sup>a\*</sup>*

*a State Key Laboratory of Chemical Resource Engineering, Beijing Key Laboratory of Advanced Functional Polymer Composites, Beijing University of Chemical Technology, Beijing 100029, China.*

*b College of Chemistry and Chemical Engineering, Qingdao University, Qingdao 266071, China. University of Bremen, Faculty of Production Engineering, D-28359 Bremen, Germany.*

*c Dental Medical Center, China-Japan Friendship Hospital, Beijing 100029, China.*

*d Institute of Clinical Medical Sciences, China-Japan Friendship Hospital, Beijing 100029, China.*

\*Corresponding author. Tel: 86-15066242101. E-mail: [weigroup@qdu.edu.cn](mailto:weigroup@qdu.edu.cn) (G. Wei)

E-mail: [suzq@mail.buct.edu.cn](mailto:suzq@mail.buct.edu.cn) (Z. Su).

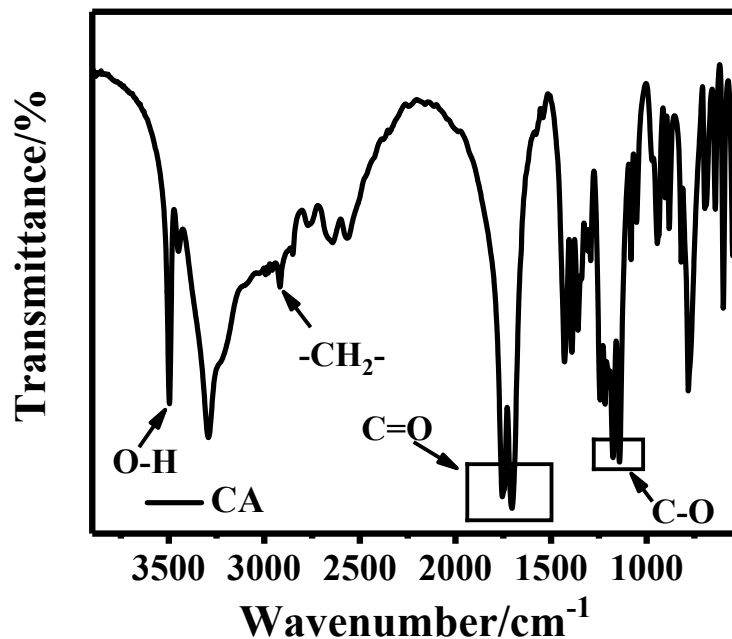

Figure S1. The FTIR spectra of CA.

The peaks at  $3496.0\text{ cm}^{-1}$  and  $2918.1\text{ cm}^{-1}$  are the stretching vibrations of -OH and -CH<sub>2</sub>- in CA.  $1750\text{ cm}^{-1}$  and  $1175\text{ cm}^{-1}$  show two sets of parallel peaks caused by the stretching vibrations of C=O and C-O in different chemical environments.

### Fluorescence lifetime:

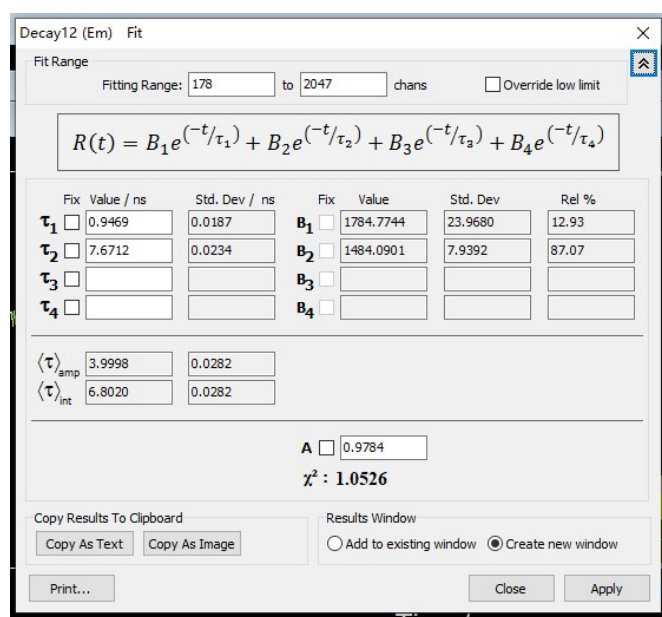

Figure S2. Parameters related to fluorescence life.

$$\tau = \frac{B_1\tau_1^2 + B_2\tau_2^2}{B_1\tau_1 + B_2\tau_2} \text{ or } \tau = \tau_1 * Rel_1\% + \tau_2 * Rel_2\%$$

Fluorescence life:

**Calculation method of absolute quantum yield:**

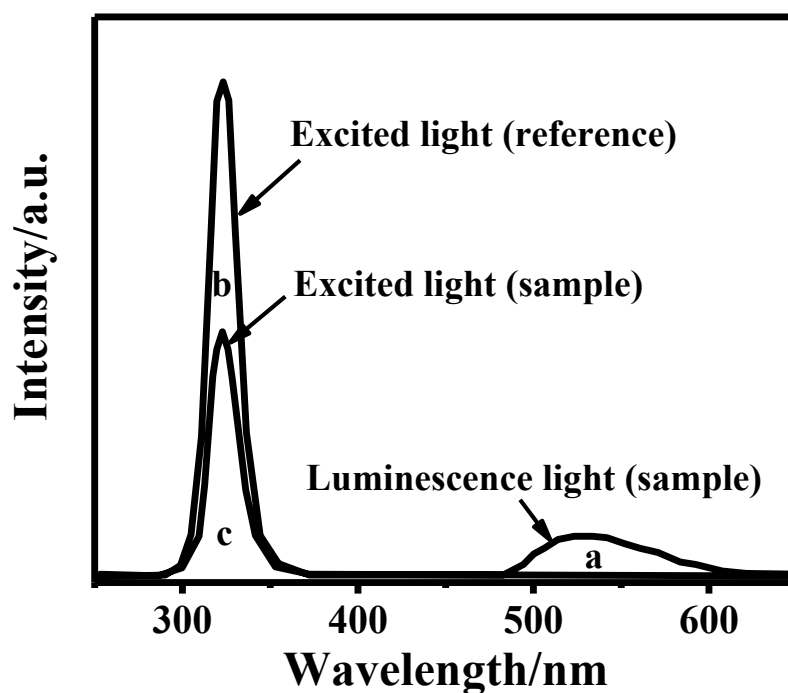

**Figure S3.** Calculation diagram of absolute quantum yield.

As shown in **Figure S3**, Absolute quantum yield:  $QY (\%) = S_a / S_b$

**Light bleaching resistant:**

Natural light is simulated using Perfectlight's PCX-50 C Discover multi-channel photocatalytic system. The synthesized Met-CDs solution is placed in the above instrument and sunlight is turned on to illuminate the solution. At 0 min, 10 min, 30 min, 60 min, 100 min, 150 min, 210 min, 270 min and so on, 5 mL Met-CDs solution is taken. The fluorescence intensity of Met-CDs solution in each group is measured by fluorescence spectrophotometer LS 55.

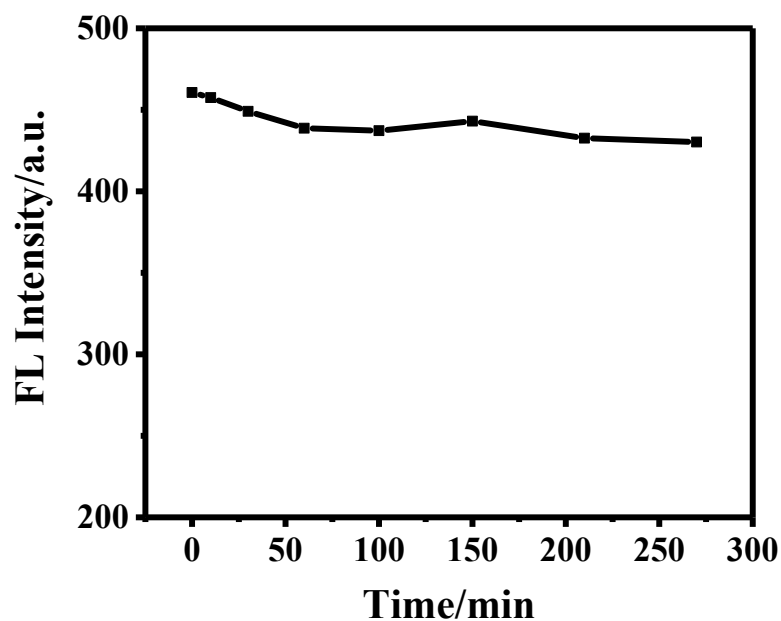

**Figure S4.** The fluorescence intensity of Met-CDs changes with time at the optimal excitation wavelength, simulating natural light. (Ex=290 nm, Em= 440 nm)

**Table S1.** The fluorescence intensity of Met-CDs changes with time at the optimal excitation wavelength, simulating natural light. (Ex=290 nm, Em= 440 nm)

| Time/min | FL intensity |
|----------|--------------|
| 0        | 460.58525    |
| 10       | 457.46517    |
| 30       | 449.07401    |
| 60       | 438.72381    |
| 100      | 437.18132    |
| 150      | 443.0613     |
| 210      | 432.62202    |
| 270      | 430.22609    |

**pH stability:**

The pH of the Met-CDs solutions is first measured using a pH meter, and then the pH of the Met-CDs solutions is adjusted using concentrated HCl solution and NaOH solid particles to

obtain different pH Met-CDs solutions, and 5 mL of the Met-CDs solutions are taken separately. Finally, the fluorescence intensity of each Met-CDs solution is measured using a fluorescence spectrophotometer LS 55.

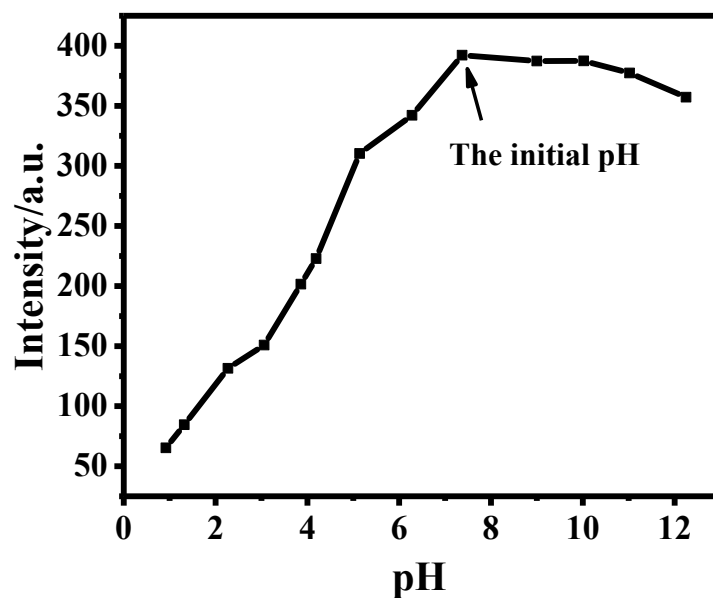

**Figure S5.** The fluorescence intensity of Met-CDs changes with pH at the optimal excitation wavelength. (Ex=290 nm, Em= 440 nm)

**Table S2.** The fluorescence intensity of Met-CDs changes with pH at the optimal excitation wavelength.

(Ex=290 nm, Em= 440 nm)

| pH   | FL intensity |
|------|--------------|
| 0.92 | 65.28294     |
| 1.32 | 84.49211     |
| 2.27 | 131.50013    |
| 3.06 | 150.87694    |
| 3.86 | 201.52866    |
| 4.19 | 222.87124    |
| 5.14 | 310.38664    |
| 6.28 | 342.17601    |
| 7.37 | 392.12993    |

|       |           |
|-------|-----------|
| 9.00  | 387.35351 |
| 10.02 | 387.44588 |
| 11.02 | 377.32981 |
| 12.25 | 357.22826 |

**Thermal stability:**

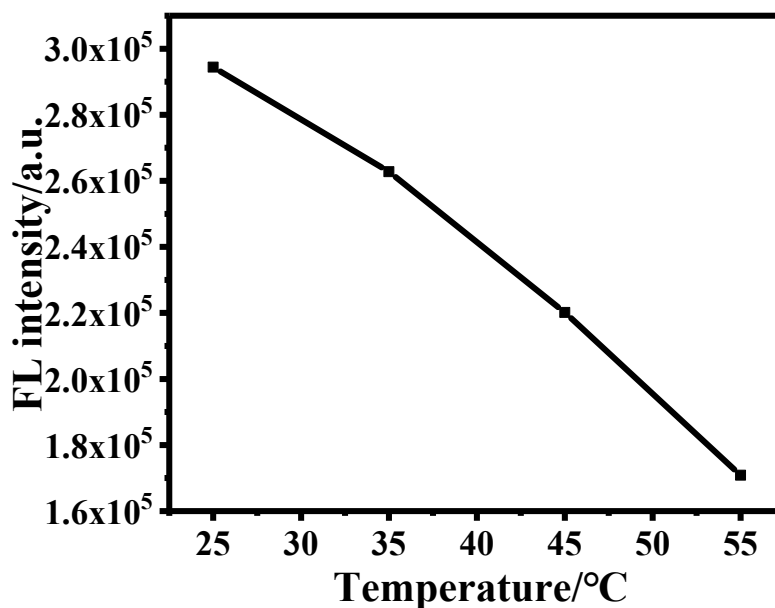

**Figure S6.** The fluorescence intensity of Met-CDs changes with temperature at the optimal excitation wavelength. (Ex=290 nm, Em= 440 nm)

**Table S3.** The fluorescence intensity of Met-CDs changes with temperature at the optimal excitation wavelength. (Ex=290 nm, Em= 440 nm)

| Temperature/°C | FL intensity |
|----------------|--------------|
| 25             | 294414.875   |
| 35             | 262753.75    |
| 45             | 220151.094   |
| 55             | 170878.281   |

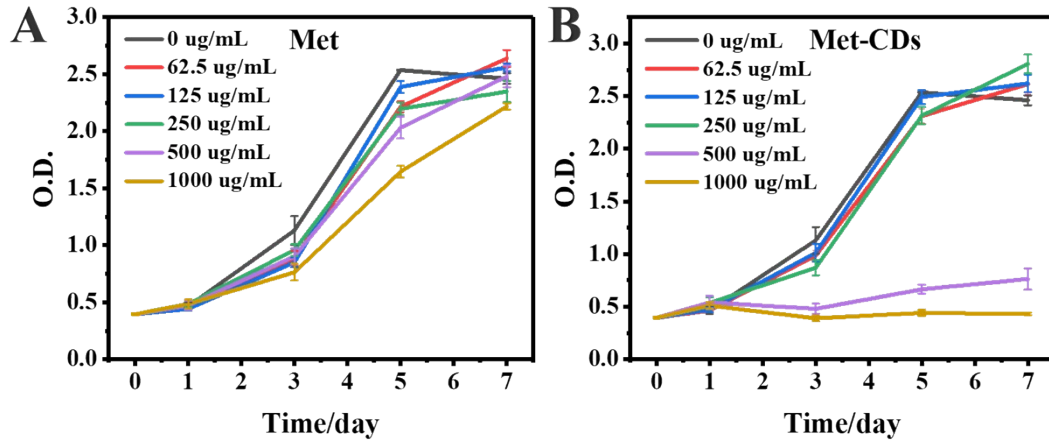

**Figure S7.** (A) Detection of Met toxicity to A549 cells ( line graph); (B) Detection of Met-CDs toxicity to A549 cells ( line graph).

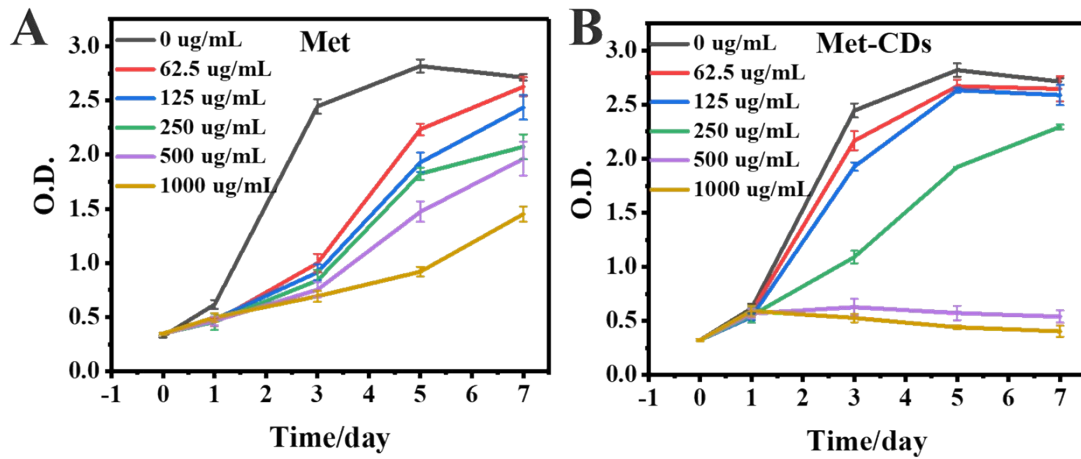

**Figure S8.** (A) Inhibitory effect of Met on the growth of A549 cells (line graph); (B) Inhibitory effect of Met-CDs on the growth of A549 cells (line graph).
